# Supplementary material for: Human brain gene expression profiles of the cathepsin V and cathepsin L cysteine proteases, with the PC1/3 and PC2 serine proteases, involved in neuropeptide production
Source: PubMed Central journal article supplement (PMC6037879; doi:10.1016/j.heliyon.2018.e00673), 2018-07-03
Supplement: mmc1.pdf [file mmc1.pdf]

### **Fig. S1 Microarray Probe Sequences for Proteases and Pro-Neuropeptide Gene Expression Studies**

Probes for microarray analyses of the human protease and pro-neuropeptide genes investigated in this study are listed. The majority of the protease and pro-neuropeptide genes were analyzed by two different probes.

#### **Proteases**

##### **CTSV** Gene ID 1504 Chromosome 9

| PROBE ID    | Probe name            | Sequences (5'-3')                                            |
|-------------|-----------------------|--------------------------------------------------------------|
| (1) 1057831 | A_23_P146456          | GAAGGACTTAAGGACAGCATGTCTGGGGAAATTTTATCTTGAAACTGACCAAACGCTTAT |
| (2) 1057832 | CUST_7879_PI416261804 | GGTTGGCTACGGCTTTGAAGGAGCAAATTCGAATAACAGCAAGTATTGGCTCGTCAAAAA |

##### **CTSL** Gene ID 1503 Chromosome 9

| PROBE ID    | Probe name             | Sequences (5'-3')                                            |
|-------------|------------------------|--------------------------------------------------------------|
| (1) 1030114 | A_23_P94533 9          | AAGACATGGATCATGGTGTGCTGGTGGTTGGCTACGGATTTGAAAGCACAGAATCAGATA |
| (2) 1030115 | CUST_15547_PI416261804 | ACTGTGGGGCCCATTCTGTTGCTATTGATGCAGGTCATGAGTCCTTCCTGTTCTATAAA  |

##### **PCSK1** Gene ID 5090 Chromosome 5

| PROBE ID    | Probe name   | Sequences (5'-3')                                            |
|-------------|--------------|--------------------------------------------------------------|
| (1) 1053306 | A_23_P213508 | CACAGAGACGACCGGCTGCTTCAAGCTCTGGTGGACATTCTGAATGAGGAAAATTTAAAT |
| (2) 1053305 | A_24_P174793 | GAGTTTAACATGTGTGGTCTTGGTATTCTTAAGGGAAGTCCACATTATACATTTGATGT  |

##### **PCSK2** Gene ID 5094 Chromosome 20

| PROBE ID    | Probe name             | Sequences (5'-3')                                            |
|-------------|------------------------|--------------------------------------------------------------|
| (1) 1053300 | A_23_P79968 20         | TGTCTCGCTAGTGATGTTTTTATGATATCCCTGATCCTAACTGAAGAGACAGTTATTTAT |
| (2) 1053301 | CUST_13562_PI416261804 | AGAAGTTTCTGCTGCCGCAACAACAATATCTGTGGAGTTGGAGTAGCATACAACCTCAA  |

##### **RNPEP** Gene ID 6019 Chromosome 1

| PROBE ID    | Probe name    | Sequences (5'-3')                                            |
|-------------|---------------|--------------------------------------------------------------|
| (1) 1052146 | A_23_P97770 1 | ACCAGGAAGATTTCTGGAAAGTGAAGGAGTTCTGCATAACCAGGGGAAGCAGAAGTATA  |
| (2) 1052147 | A_24_P68649   | GCAACAGGAGAGAAGCTTTTTGGACCTTATGTTTGGGGAAGGTATGACTTGCTCTTCATG |

##### **CTSH** Gene ID 1501 Chromosome 15

| PROBE ID    | Probe name             | Sequences (5'-3')                                            |
|-------------|------------------------|--------------------------------------------------------------|
| (1) 1023745 | A_23_P14774            | ACCAGCCATGTGCCTTAGTGTCTTCTTAACAGACTCAAACCACATGGACCACGAATATT  |
| (2) 1023746 | CUST_10722_PI416261804 | AAGTTCCAACCTGGAAAGGCCATCGGCTTTGTCAAGGATGTAGCCAACATCACAATCTAT |

##### **CPE** Gene ID 1354 Chromosome 4

| PROBE ID    | Probe name   | Sequences (5'-3')                                            |
|-------------|--------------|--------------------------------------------------------------|
| (1) 1057996 | A_23_P259442 | TCTTGTGCTGACTAACTATAAGCATGATCTTGTTAATGCATTTTTGATGGGAAGAAAAGG |
| (2) 1057997 | A_32_P34372  | ACTCCGAGCTGTATCTGTTAACCTTTTCAATAGCATTATTATGTGACATTGTCACCAAT  |

## Pro-Neuropeptides

### **PENK** Gene ID 5179 Chromosome 8

| PROBE ID    | Probe name             |
|-------------|------------------------|
| (1) 1018602 | A_23_P417918           |
| 1053200     | CUST_11041_PI416261804 |
| 1013153     | CUST_11043_PI416261804 |
| (2) 1010876 | CUST_15_PI416558187    |

#### Sequences (5'-3'):

```
TTTGCTAGCCAAAAGGTATGGGGGCTTCATGAAAAGGTATGGAGGCTTCATGAAGAAAAT  
TCTCTCCTCGCAGTCCATGGCGCGGTTCTGACACTTTGCACTTGGCTGCTGTTGCTCGG  
TTCCAATTGGCCTGCTCCATCCGAACAGCGTCAACTCCATGGCGCGGTTCTGACACTTT  
TTCATTGTCTGGATAACTATAACAACCTGAAAACCTGTCATTTTCAGGTTCTGTGCTCTTTTT
```

### **NPY** Gene ID 4821 Chromosome 7

| PROBE ID    | Probe name             |
|-------------|------------------------|
| (1) 1053652 | A_23_P256470           |
| (2) 1053653 | CUST_16166_PI416261804 |

#### Sequences (5'-3'):

```
TTGAAGACCCTGCAATGTGGTGTATGGGAAATGAGACTTGCTCTCTGGCCTTTTCCTATTT  
AGAGACACTGATTTTCAGACCTCTTGATGAGAGAAAGCACAGAAAATGTTCCCAGAACTCG
```
